# Supplementary material for: CTCs Expression Profiling for Advanced Breast Cancer Monitoring
Source: MDPI journal article supplement (doi:10.3390/cancers11121941), 2019-12-04
Supplement: s1 [file s1]

## Supplementary Material

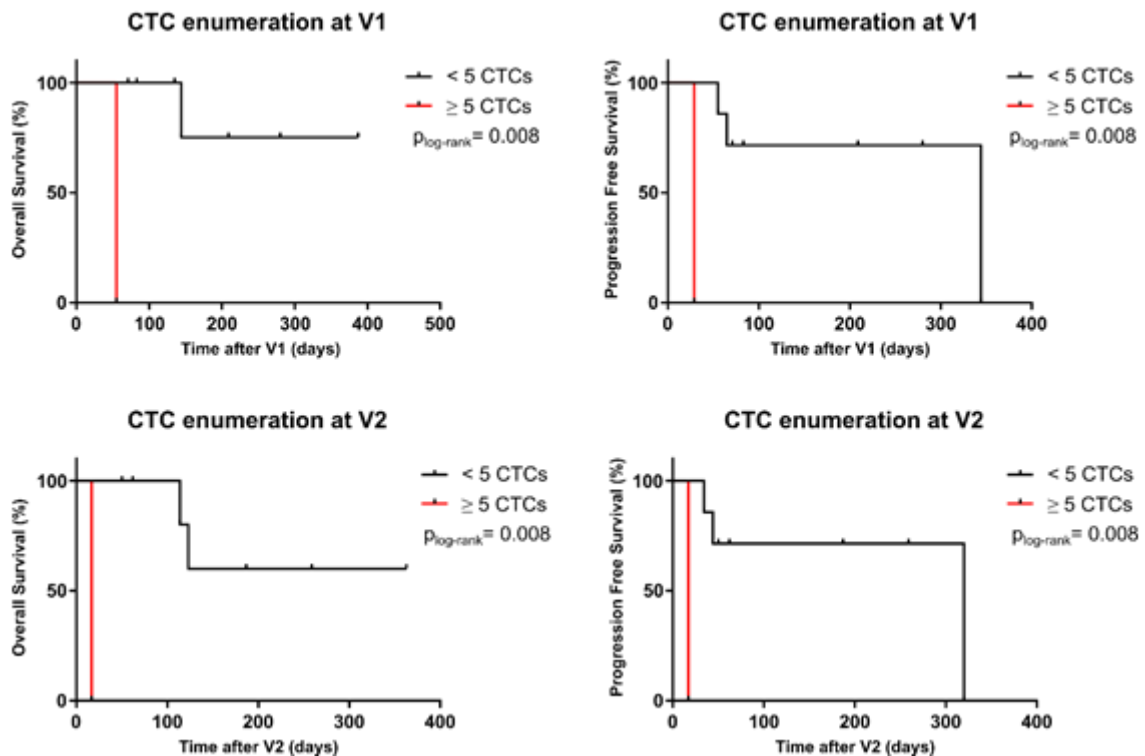

**Figure S1.** Estimates of probabilities for OS and PFS at V1 (OS: 55 days,  $p = 0.008$ ; PFS: 29 days,  $p = 0.008$ ) and V2 (OS: 17 days,  $p = 0.008$ ; PFS: 17 days,  $p = 0.008$ ) in TNBC patients with  $\geq 5$  CTCs or  $< 5$  CTCs per 7.5 ml of blood.

## Metastasis sites

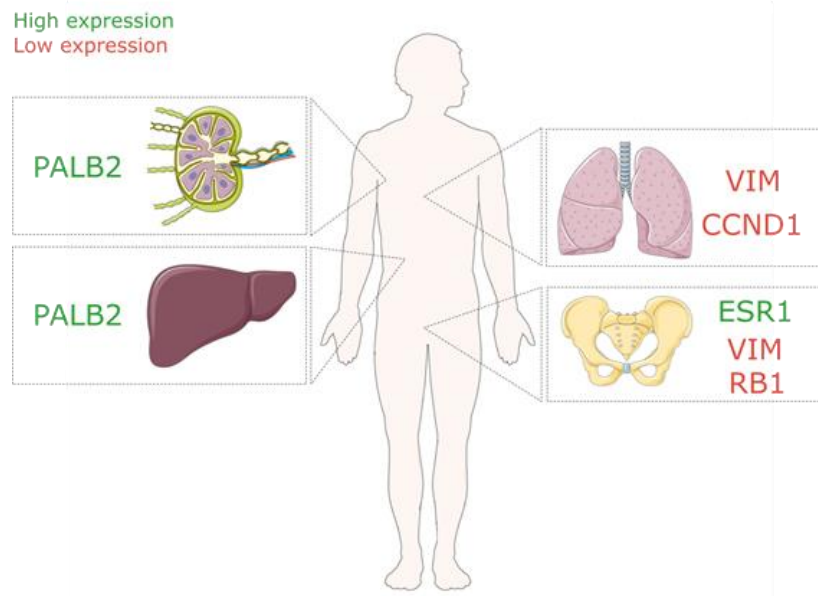

**Figure S2.** Representation of high or low expressed genes on the CTCs isolated fraction depending on the metastasis site.

**Table S1.** Gene Expression Custom Panel Assay For The Study of CTCs On The BC Patient's Cohort.

| Gene name | Taqman Assay  | Functional Gene Grouping            |
|-----------|---------------|-------------------------------------|
| ALDH1A1   | Hs00946916_m1 | Stem                                |
| B2M       | Hs00187842_m1 | Housekeeping gene                   |
| BCL11A1   | Hs01093197_m1 | Stem                                |
| BCL2      | Hs00608023_m1 | Apoptosis                           |
| CCND1     | Hs00765553_m1 | Proliferation/cell cycle regulation |
| CD36      | Hs00354519_m1 | Cell metabolism                     |
| CDH1      | Hs00170423_m1 | Epithelial                          |
| CDK4      | Hs01565683_g1 | Proliferation/cell cycle regulation |
| CTNNB1    | Hs00355049_m1 | Cell adhesion/gene transcription    |
| E2F4      | Hs00608098_m1 | Proliferation/cell cycle regulation |
| EpCAM     | Hs00158980_m1 | Epithelial                          |
| ERBB2     | Hs01001580_m1 | Breast cancer associated            |
| ESR1      | Hs01046816_m1 | Breast cancer associated            |
| FAS       | Hs00163653_m1 | Apoptosis                           |
| GDF15     | Hs00171132_m1 | Proliferation/cell cycle regulation |
| KRT5      | Hs00361185_m1 | Epithelial                          |
| KRT19     | Hs00761767_s1 | Epithelial                          |
| MYC       | Hs00153408_m1 | Oncogene                            |
| MYCL      | Hs00420495_m1 | Oncogene                            |
| PALPB2    | Hs00226617_m1 | Breast cancer associated            |
| PROM1     | Hs01009257_m1 | Stem                                |
| PTPRC     | Hs04189704_m1 | Blood cell                          |
| RB1       | Hs01078066_m1 | Proliferation/cell cycle regulation |
| SNAI1     | Hs00195591_m1 | EMT                                 |
| VIM       | Hs00958116_m1 | EMT                                 |
| ZEB1      | Hs00232783_m1 | EMT                                 |

**Table S2.** Clinical Parameters of The BC Patients Included In The Study.

| Table I. Clinical parameters |                  |
|------------------------------|------------------|
| Variable                     | n(%)             |
| Age                          |                  |
| > 50 years                   | 14 (70%)         |
| ≤ 50 years                   | 6 (30%)          |
| Tumour Stage                 |                  |
| IV                           | 20 (100%)        |
| ER status                    |                  |
| Positive                     | 8 (40%)          |
| Negative                     | 12 (60%)         |
| PR status                    |                  |
| Positive                     | 7 (35%)          |
| Negative                     | 13 (65%)         |
| HER2 status                  |                  |
| Positive                     | 6 (30%)          |
| Negative                     | 14 (70%)         |
| Metastasis location          |                  |
| Bone & Visceral              | 10 (50%)         |
| Visceral                     | 9 (45%)          |
| Unknown                      | 1 (5%)           |
| <b>Total</b>                 | <b>20 (100%)</b> |
